# Supplementary material for: Fatty Acid Desaturation Is Suppressed in Mir-26a/b Knockout Goat Mammary Epithelial Cells by Upregulating INSIG1
Source: MDPI journal article supplement (doi:10.3390/ijms241210028), 2023-06-12
Supplement: s1 [file s1]

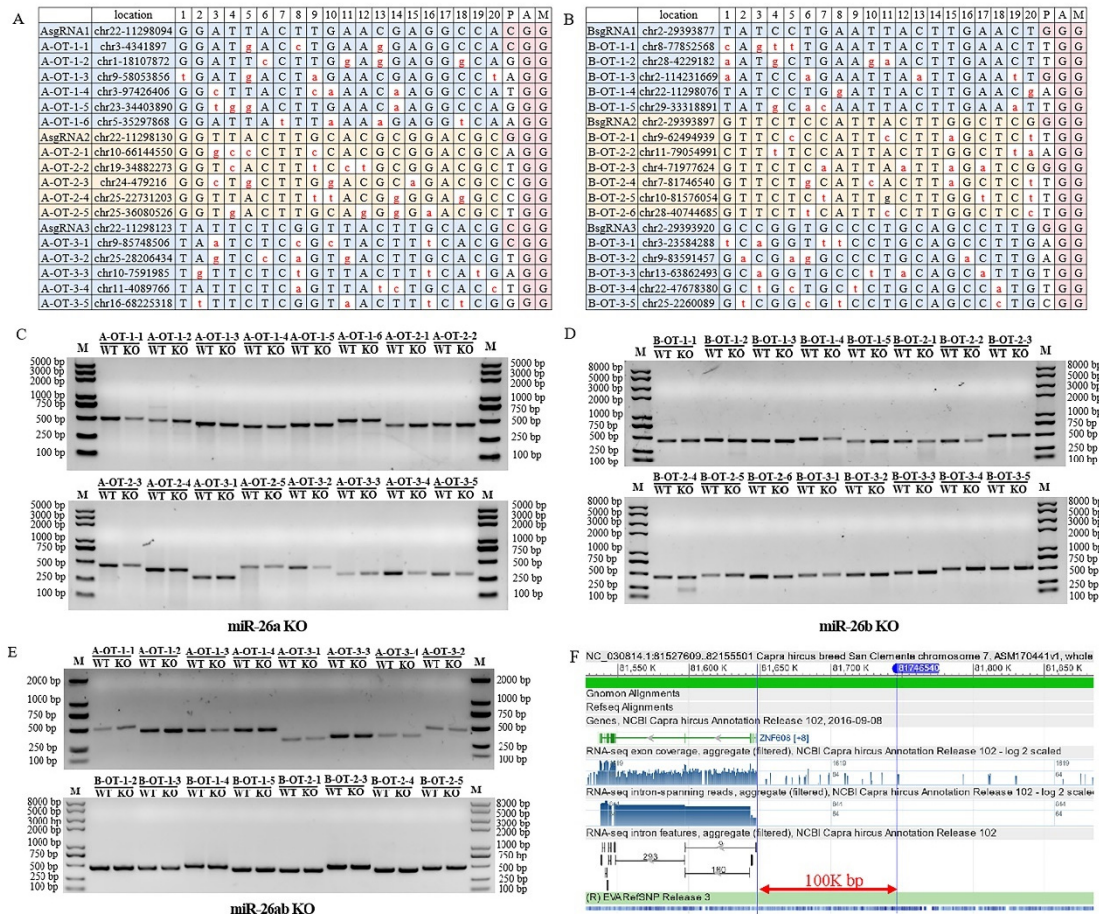

**Figure S3.** Off-target effects. (A) miR-26a sgRNAs of off-target sites predicted using bioinformatics software. (B) miR-26b sgRNAs of off-target sites predicted using bioinformatics software. Red lowercase letters indicate mismatched bases. (C–E) T7EN1 digestion at the off-target site. (F) Location of off-target B-OT-2-4 in the genome.

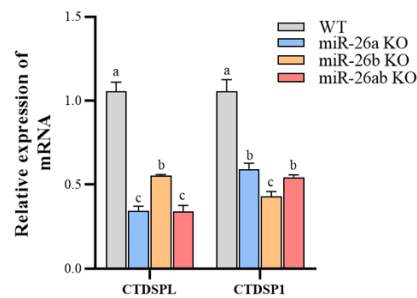

**Figure S4.** Expression of miR-26 host genes. WT, wild-type GMECs. miR-26a KO, miR-26a knockout GMECs. miR-26b KO, miR-26b knockout GMECs. miR-26ab KO, GMECs with co-knockout of miR-26a and miR-26b. Data are shown as mean  $\pm$  SD for three independent experiments. Lower case letters,  $p < 0.05$ .

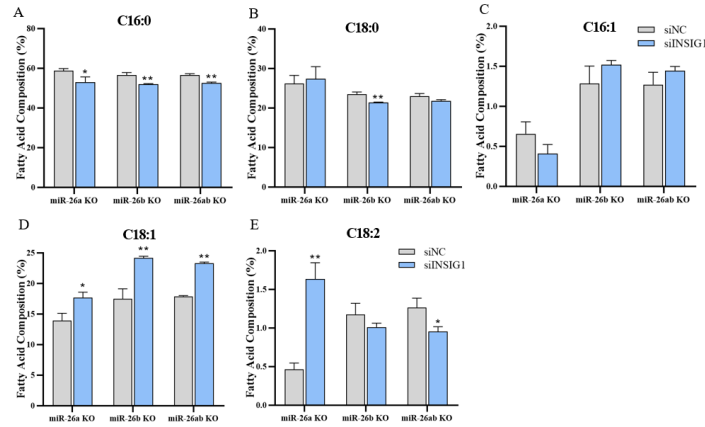

**Figure S5.** The percentage of fatty acid in knockout GMECs with inhibiting *INSIG1*. C16:0, palmitic acid. C18:0, stearic acid. C16:1, palmitoleic acid. C18:1, oleic acid. C18:2, linoleic acid. WT, wild-type GMECs. miR-26a KO, miR-26a knockout GMECs. miR-26b KO, miR-26b knockout GMECs. miR-26ab KO, GMECs with co-knockout of miR-26a and miR-26b. Data are shown as mean  $\pm$  SD for three independent experiments. \*,  $p < 0.05$ . \*\*,  $p < 0.01$ .

**Table S1.** Effects on fatty acid composition in knockout GMECs.

| Fatty Acid (%) | WT                            | miR-26a KO                    | miR-26b KO                    | miR-26ab KO                   |
|----------------|-------------------------------|-------------------------------|-------------------------------|-------------------------------|
| C16:1          | 0.73 $\pm$ 0.06               | 0.73 $\pm$ 0.15               | 0.60 $\pm$ 0.16               | 0.64 $\pm$ 0.15               |
| C16:0          | 50.51 $\pm$ 2.04 <sup>b</sup> | 52.75 $\pm$ 0.70 <sup>b</sup> | 58.15 $\pm$ 0.51 <sup>a</sup> | 58.76 $\pm$ 2.57 <sup>a</sup> |
| C18:2          | 4.81 $\pm$ 0.58 <sup>a</sup>  | 3.98 $\pm$ 0.60 <sup>b</sup>  | 1.34 $\pm$ 0.15 <sup>c</sup>  | 0.44 $\pm$ 0.05 <sup>d</sup>  |
| C18:1          | 18.65 $\pm$ 0.64 <sup>a</sup> | 14.31 $\pm$ 0.62 <sup>b</sup> | 14.01 $\pm$ 1.53 <sup>b</sup> | 12.24 $\pm$ 0.5 <sup>c</sup>  |
| C18:0          | 25.30 $\pm$ 1.26              | 28.23 $\pm$ 0.78              | 25.89 $\pm$ 1.57              | 27.92 $\pm$ 2.88              |
| SFA            | 75.81 $\pm$ 0.96 <sup>d</sup> | 80.98 $\pm$ 0.71 <sup>c</sup> | 84.05 $\pm$ 1.52 <sup>b</sup> | 86.67 $\pm$ 0.35 <sup>a</sup> |
| UFA            | 24.19 $\pm$ 0.96 <sup>a</sup> | 19.02 $\pm$ 0.71 <sup>b</sup> | 15.95 $\pm$ 1.52 <sup>c</sup> | 13.33 $\pm$ 0.35 <sup>d</sup> |

Statistical analysis among these four groups was assessed via one-way ANOVA with Duncan's test. Statistical significance is as follows: lowercase letters,  $p < 0.05$ , and the different lowercase letters represent a significant difference between any two groups. Data are shown as mean  $\pm$  SD. WT, the wild-type GMECs. miR-26a KO, the miR-26a knockout GMECs; miR-26b KO, the miR-26b knockout GMECs; miR-26ab KO, the miR-26a and miR-26b co-knockout GMECs.

**Table S2.** Effects of *INSIG1* silencing on fatty acid composition in knockout GMECs.

| Fatty Acid (%) | miR-26a KO       |                     | miR-26b KO       |                     | miR-26ab KO      |                     |
|----------------|------------------|---------------------|------------------|---------------------|------------------|---------------------|
|                | siNC             | siINSIG1            | siNC             | siINSIG1            | siNC             | siINSIG1            |
| C16:1          | 1.28 $\pm$ 0.22  | 1.52 $\pm$ 0.05     | 1.27 $\pm$ 0.15  | 1.44 $\pm$ 0.05     | 0.66 $\pm$ 0.15  | 0.41 $\pm$ 0.12     |
| C16:0          | 56.60 $\pm$ 1.25 | 51.88 $\pm$ 0.33 ** | 56.55 $\pm$ 0.72 | 52.49 $\pm$ 0.56 ** | 58.78 $\pm$ 1.04 | 52.88 $\pm$ 2.76 *  |
| C18:2          | 1.18 $\pm$ 0.14  | 1.01 $\pm$ 0.05     | 1.27 $\pm$ 0.12  | 0.95 $\pm$ 0.06 *   | 0.46 $\pm$ 0.08  | 1.63 $\pm$ 0.21 **  |
| C18:1          | 17.48 $\pm$ 1.63 | 24.17 $\pm$ 0.28 ** | 17.89 $\pm$ 0.12 | 23.28 $\pm$ 0.22 ** | 13.92 $\pm$ 1.19 | 17.70 $\pm$ 0.86 *  |
| C18:0          | 23.46 $\pm$ 0.59 | 21.42 $\pm$ 0.08 ** | 23.02 $\pm$ 0.63 | 21.83 $\pm$ 0.27    | 26.19 $\pm$ 2.05 | 27.37 $\pm$ 3.09    |
| SF *           | 80.06 $\pm$ 1.83 | 73.30 $\pm$ 0.34 ** | 79.57 $\pm$ 0.09 | 74.32 $\pm$ 0.31 ** | 84.96 $\pm$ 1.05 | 80.25 $\pm$ 0.97 ** |
| UF *           | 19.94 $\pm$ 1.83 | 26.70 $\pm$ 0.34 ** | 20.43 $\pm$ 0.09 | 25.68 $\pm$ 0.31 ** | 15.04 $\pm$ 1.05 | 19.75 $\pm$ 0.97 ** |

Differences between the two treatments were tested for significance using Student's *t*-test, where differences were considered to be statistically significant when  $p < 0.05$  (\*  $p < 0.05$ , \*\*  $p < 0.01$ ). Data are shown as mean  $\pm$  SD. WT, the wild-type GMECs. miR-26a KO, the miR-26a knockout GMECs. miR-26b KO, the miR-26b knockout GMECs. miR-26ab KO, the miR-26a and miR-26b co-knockout GMECs. siNC, negative control of interfering RNA. siINSIG1, interfering RNA of *INSIG1*.

Table S3. Primers of PCR.

| Primer   | Primer Sequence (5' to 3') |                              | Product Size (bp) |
|----------|----------------------------|------------------------------|-------------------|
| PCR-26a  | F: GGCAGGCACTTGGGCATTTA    | R: CCTTTGGGATGCTGCTTGGA      | 584               |
| PCR-26b  | F: CAGGTTCTCCACCAGTCC      | R: GGTAACACCCACCGTCCC        | 420               |
| A-OT-1-1 | F: GTCCCACTTAAAGATTCCTACC  | R: TTCAGCCTCAAACACTCCA       | 487               |
| A-OT-1-2 | F: CAAATGAGACCCAGCAAAG     | R: GGCCAGCAAGTTAAGGATG       | 425               |
| A-OT-1-3 | F: GCCACTCAGAACCTCAAATGC   | R: TCACTTTACCCAAGGTTGCCTT    | 429               |
| A-OT-1-4 | F: CTCTGCCTTCCAGCACATCA    | R: CTCCGACTTTGCTCAGCTGAA     | 408               |
| A-OT-1-5 | F: CTGTCCTCCTCTTCCTCGGA    | R: TGCCTTGTGTGGTCAAAGGTT     | 435               |
| A-OT-1-6 | F: TGCCAGACCTAAGCAATCT     | R: TGGTGTGCCCTGTTAACGTTA     | 498               |
| A-OT-2-1 | F: CCACCCAGGCGGGAGTTGTA    | R: TTACACGTAGGCAGGCCAGCTGGGG | 481               |
| A-OT-2-2 | F: GCACCTGCCCAGTGCTAT      | R: TGCGAGAAGGACCCCAAG        | 427               |
| A-OT-2-3 | F: TCCCAAACGTGCATTCTG      | R: GGCCGGTTCTCACCAGTA        | 436               |
| A-OT-2-4 | F: ACGTCTAACCTCACTCCCATTT  | R: AGCAGCCCAAGCAGAAAA        | 447               |
| A-OT-2-5 | F: GGTCAAGCCAGCATTCGT      | R: GCGGCTCTTATGTCTCCTC       | 400               |
| A-OT-3-1 | F: TGTACCTGGTGCTCTTCT      | R: CGTTCTACCTTACTGCGTGCCTGCG | 316               |
| A-OT-3-2 | F: TCAGGGTATGCCATTGTG      | R: GAGGGAAGTGAGTGCAGATA      | 444               |
| A-OT-3-3 | F: CCATCACTGCCTGGAACA      | R: GAAAGGGAAAAGTGAAAGTGAAGTC | 353               |
| A-OT-3-4 | F: GTCCGATCATTTCTTGTC      | R: TCGTGTATCCCTTTTGTGTCATG   | 357               |
| A-OT-3-5 | F: TTCTTTGCGGGCTGAAAC      | R: CCGAAGTACATCAGGAGGAT      | 329               |
| B-OT-1-1 | F: TTCCTGTCCCAAGGCATGAC    | R: CCTTTCATCAGGCCACACTG      | 424               |
| B-OT-1-2 | F: TCTCAGCGCCTAACACAGTC    | R: ACAGTCTCAGTGCAGAACCGG     | 433               |
| B-OT-1-3 | F: GACTGCTGCACACAACTG      | R: AGCTAGGAGGGTGTGGATGTC     | 439               |
| B-OT-1-4 | F: ATGAAGGAGAAGCTGCCCAC    | R: GTCTCCTTTGGGATGCTGCTT     | 473               |
| B-OT-1-5 | F: CGCCAAAAGTTACAAGGGGC    | R: TGCCACTTCTCACTCTCAGCT     | 418               |
| B-OT-2-1 | F: AGATCCACTTCATCCCCGA     | R: GTGCCTTCTCCGAGTCCAAAA     | 412               |
| B-OT-2-2 | F: CGAAAGTCCAACCTGCTTAAGGG | R: GGGATGGGCAGCATCCTTAAT     | 402               |
| B-OT-2-3 | F: GCAAGGTTGAGGGGTGCTAT    | R: ACATTAATGCTGCAGGGGCTT     | 489               |
| B-OT-2-4 | F: TACCCTTCCCTGCTATCCCC    | R: CGTCATCACCCAGAGACCTGT     | 425               |
| B-OT-2-5 | F: CAGACAGCAGAAGCCTGACA    | R: GAATAGGCCACAGGTTTGGA      | 454               |
| B-OT-2-6 | F: GAGCTTGGGTTTGCTTTGCA    | R: GGGATGTGTGTCGCTCTGTTT     | 417               |
| B-OT-3-1 | F: AGGCAGGAACATTTGTGAACA   | R: CACTGACCCAAAACCGGAGTA     | 429               |
| B-OT-3-2 | F: ATTAGTGGCAGCGCTTCTGT    | R: CGTCCCGTCACTTTCCTTGAG     | 412               |
| B-OT-3-3 | F: GAGGAGTGCATGTTCCCCAA    | R: AGGGCAGAGAACATCCCTCTG     | 437               |
| B-OT-3-4 | F: AGCCTTGCTCCATCCTGAAC    | R: CACATGTACGCCTCCCTTTC      | 491               |
| B-OT-3-5 | F: CTTCCGCCTCTTCGAGCTG     | R: GTCACCGTCGAGAAGACCTGG     | 498               |

F: forward primer. R: reverse primer.

Table S4. All qPCR primers.

| Gene       | GenBank ID     | Primer Sequence (5' to 3')                             | Product Size (bp) | Efficiency |
|------------|----------------|--------------------------------------------------------|-------------------|------------|
| miR-26a-5p | /              | F: CGTTCAAGTAATCCAGGATAGGCT                            | /                 | 2.01       |
| miR-26a-3p | /              | F: GGCCTATTCTCGGTACTTGCACG                             | /                 | 1.96       |
| snRNA U6   | /              | F: CTCGCTTCGGCAGCACATA                                 | /                 | 2.10       |
| ACACA      | XM_018064174.1 | F: CTCCAACCTCAACCACTACGG<br>R: GGGGAATCACAGAAGCAGCC    | 171               | 2.15       |
| ACSS2      | XM_018057751.1 | F: GGCGAATGCCTCTACTGCTT<br>R: GGCCAATCTTTCTCTAATCTGCTT | 100               | 2.13       |
| AGPAT6     | XM_018041984.1 | F: AAGCAAGTTGCCCATCCTCA<br>R: AAAGTGTGGCTCCAATTTCA     | 101               | 2.30       |

---

|         |                |                                                                |     |      |
|---------|----------------|----------------------------------------------------------------|-----|------|
| CTDSP1  | XM_018059509.1 | F: CCAAAGCCCAGGACTCGGACAAGA<br>R: GGACCACCCCATCAATCTCCACAGG    | 126 | 2.12 |
| CTDSPL  | XM_018066968.1 | F: TGACCAGAGGCAGATCATTCCCATAACC<br>R: TGTGGCCGCTTCAGCACATACACC | 213 | 2.06 |
| DGAT1   | XM_018058728.1 | F: CCACTGGGACCTGAGGTGTC<br>R: GCATCACCACACACCAATTCA            | 101 | 1.94 |
| DGAT2   | XM_018058853.1 | F: CATGTACACATTCTGCACCGATT<br>R: TGACCTCCTGCCACCTTTCT          | 100 | 2.10 |
| FASN    | NM_001285629.1 | F: GGGCTCCACCACCGTGTTCCA<br>R: GCTCTGCTGGGCCTGCAGCTG           | 226 | 2.08 |
| FADS2   | XM_018043056.1 | F: AAAGGGTGCCTCTGCCAACT<br>R: ACACGTGCAGCATGTTTACA             | 101 | 2.06 |
| GPAM    | XM_005698479.3 | F: ATTGACCCTTGGCACGATAG<br>R: AACAGCACCTTCCCACAAAG             | 188 | 2.02 |
| INSIG1  | NM_001286088.1 | F: AGCCTCACAAGTTCAAGCG<br>R: ACAGTGCTGCTAATGTCAAGG             | 132 | 2.05 |
| PPARG   | NM_001285658.1 | F: CCTTCACCACCGTTGACTTCT<br>R: GATACAGGCTCCACTTTGATTGC         | 145 | 1.93 |
| SCD1    | NM_001285619.1 | F: CCATCGCCTGTGGAGTCAC<br>R: GTCGGATAAATCTAGCGTAGCA            | 257 | 2.02 |
| SREBP1A | NM_001285755.1 | F: CTGCTGACCGACATAGAAGACAT<br>R: GTAGGGCGGGTCAAACAGG           | 81  | 2.00 |
| SREBP1c | NM_001285755.1 | F: ACGCCATCGAGAAACGCTAC<br>R: GTGCGCAGACTCAGGTTCTC             | 181 | 2.04 |
| SREBP2  | XM_018048827.1 | F: CGGCGTGATCGTGCTGAGCGTC<br>R: CCGACAGGCAGGTTTGCAGGTTGG       | 173 | 2.03 |
| UXT     | XM_005700842.2 | F: TGTGGCCCTTGGATATGGTT<br>R: GGTTGTCGCTGAGCTCTGTG             | 101 | 2.06 |

---

F: forward primer. R: reverse primer.
